# Supplementary material for: Nano Milk Protein-Mucilage Complexes: Characterization and Anticancer Effect
Source: MDPI journal article supplement (doi:10.3390/molecules26216372), 2021-10-21
Supplement: s1 [file s1]

Supplementary Data

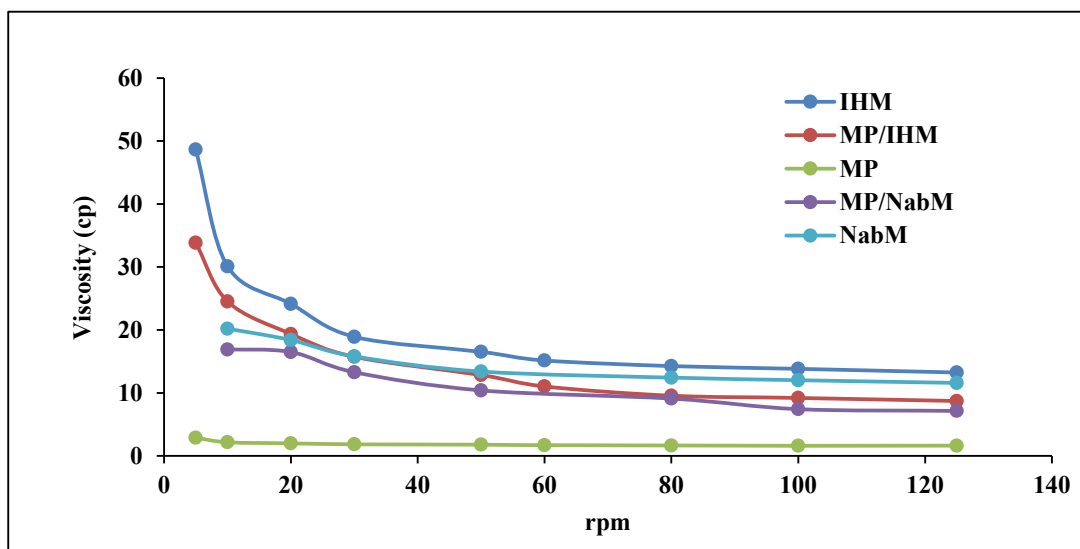

**Figure S1.** The apparent viscosity of MP, IHM, NabM and MPMC: MP: milk protein, IHM; isabgol husk mucilage, NabM: Nabeq mucilage, MP/IHM: milk proteins/isabgol husk mucilage complex and MP/NabM: milk proteins/Nabeq mucilage complex

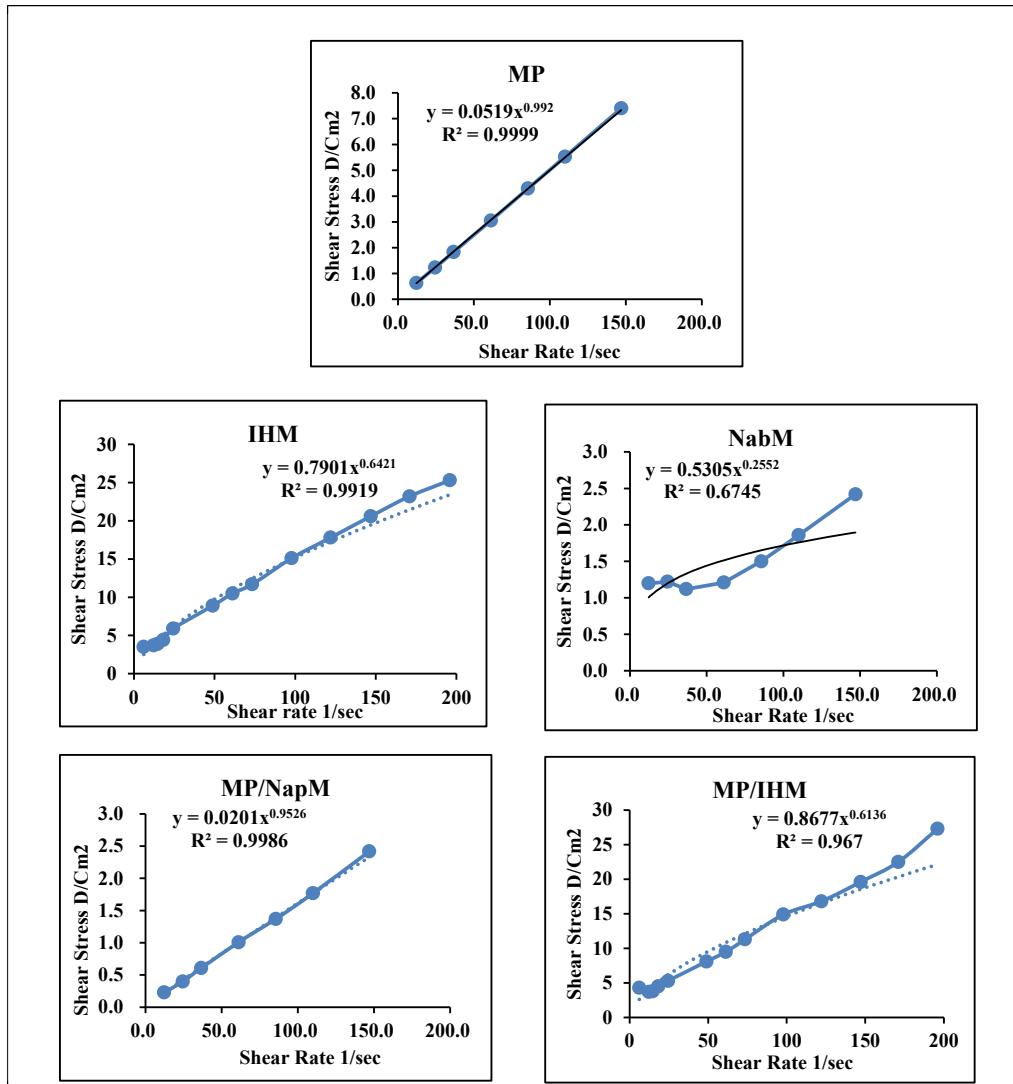

**Figure S2.** Shear stress vs shear rate curves of BTMP: buffalo total milk protein, NabM: Nabeq mucilage, IHM: isabgol husk mucilage, BTMP/NabM: buffalo total milk proteins/ Nabeq mucilage complex, BTMP/IHM: buffalo total milk proteins/isabgol husk mucilage complex

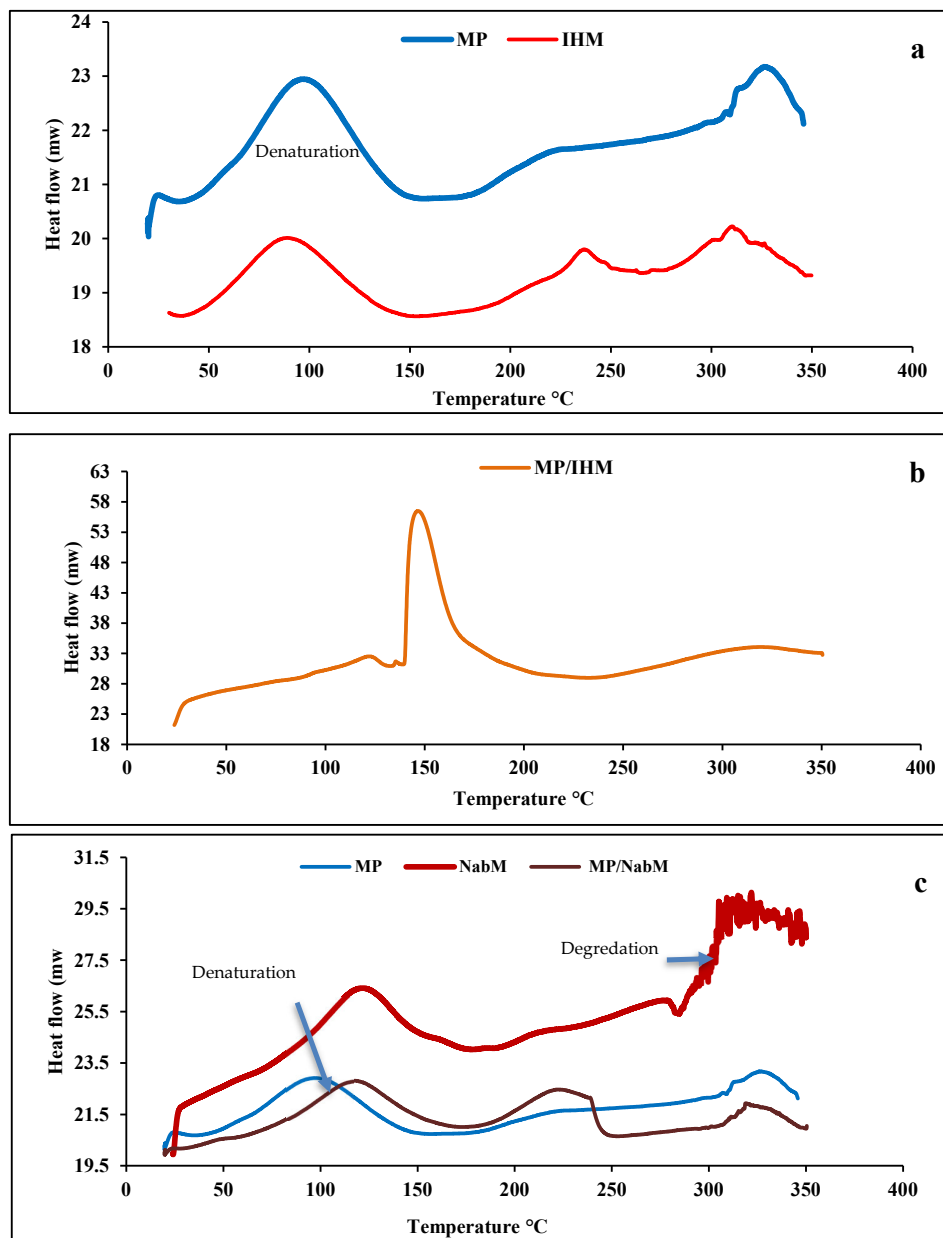

**Figure S3.** Differential scanning calorimetry thermograms of: a) MP: milk protein, IHM: isabgol husk mucilage; b) MP/IHM: milk proteins/isabgol husk mucilage complex; c) MP: milk protein, NabM: Nabeq mucilage and MP/NabM: milk proteins/Nabeq mucilage complex

---

**Table S1.** Parameters of the power law equation of MP and MPMC\*.

| Samples                     | IHM  | NabM | MP    | MP/IHM | MP/NabM |
|-----------------------------|------|------|-------|--------|---------|
| <b>K (Pa.s<sup>n</sup>)</b> | 0.79 | 0.53 | 0.053 | 0.87   | 0.027   |
| <b>n</b>                    | 0.64 | 0.25 | 0.992 | 0.61   | 0.95    |
| <b>R<sup>2</sup></b>        | 0.97 | 0.62 | 0.99  | 0.93   | 0.99    |

\*K: consistency index; n: flow behavior index; R<sup>2</sup>: R-squared statistic; NabM: Nabeq mucilage; IHM: isabgol husk mucilage; MP: milk protein; MP/NabM: milk proteins/Nabeq mucilage complex; MP/IHM: milk proteins/isabgol husk mucilage complex.
